# Supplementary material
Source: PubMed Central journal article supplement (PMC4495769)
Supplement: NIHMS683841-supplement-Supp4.pdf [file NIHMS683841-supplement-Supp4.pdf]

Supplementary Table 10:  $R^2$  matrix of LD Scores with varying window sizes

| cM    | 0.01   | 0.1    | 0.25   | 0.5    | 0.75   | 1             | 1.25          | 1.5           | 1.75          | 2             | 2.25          | 2.5           |
|-------|--------|--------|--------|--------|--------|---------------|---------------|---------------|---------------|---------------|---------------|---------------|
| 0.001 | 0.6677 | 0.4249 | 0.3769 | 0.3642 | 0.3543 | <b>0.3505</b> | 0.3504        | 0.3494        | 0.3489        | 0.3485        | 0.3485        | 0.3479        |
| 0.01  |        | 0.7553 | 0.6929 | 0.6732 | 0.6603 | <b>0.6530</b> | 0.6523        | 0.6502        | 0.6487        | 0.6476        | 0.6479        | 0.6463        |
| 0.1   |        |        | 0.9651 | 0.9538 | 0.9424 | <b>0.9359</b> | 0.9347        | 0.9328        | 0.9314        | 0.9303        | 0.9300        | 0.9289        |
| 0.25  |        |        |        | 0.9899 | 0.9856 | <b>0.9810</b> | 0.9801        | 0.9786        | 0.9773        | 0.9763        | 0.9764        | 0.9751        |
| 0.5   |        |        |        |        | 0.9955 | <b>0.9934</b> | 0.9930        | 0.9920        | 0.9911        | 0.9904        | 0.9904        | 0.9895        |
| 0.75  |        |        |        |        |        | <b>0.9981</b> | <b>0.9980</b> | <b>0.9973</b> | <b>0.9965</b> | <b>0.9960</b> | <b>0.9961</b> | <b>0.9952</b> |
| 1     |        |        |        |        |        |               | 0.9995        | 0.9993        | 0.9990        | 0.9986        | 0.9985        | 0.9980        |
| 1.25  |        |        |        |        |        |               |               | 0.9996        | 0.9993        | 0.9990        | 0.9990        | 0.9986        |
| 1.5   |        |        |        |        |        |               |               |               | 0.9997        | 0.9995        | 0.9994        | 0.9992        |
| 1.75  |        |        |        |        |        |               |               |               |               | 0.9997        | 0.9995        | 0.9995        |
| 2     |        |        |        |        |        |               |               |               |               |               | 0.9996        | 0.9997        |
| 2.25  |        |        |        |        |        |               |               |               |               |               |               | 0.9995        |

Each entry is the squared Pearson correlation between the LD Score estimated from the 1000 Genomes Project European reference panel with the window radii listed across the top row and the leftmost column in units of centiMorgans (cM). We chose to use the 1 cM LD Score for all LD Score regressions applied to real data, so the squared correlations with the 1 cM LD Score are in bold
